# Supplementary material for: New protic ionic liquids for fungi and bacteria removal from paper heritage artefacts
Source: Royal Society of Chemistry journal article supplement (doi:10.1039/c9ra03067k), 2019-01-01
Supplement: c9ra03067k1.pdf [file c9ra03067k1.pdf]

## Electronic Supporting Information

### **New protic ionic liquids for fungi and bacteria removal from paper heritage artefacts**

Nataša Dimitrić<sup>a</sup>, Nemanja Spremo<sup>a</sup>, Milan Vraneš<sup>a</sup>, Sanja Belić<sup>a</sup>, Maja Karaman<sup>a</sup>, Strahinja Kovačević<sup>b</sup>, Milica Karadžić<sup>b</sup>, Sanja Podunavac-Kuzmanović<sup>b</sup>, Daniela Korolija-Crkvenjakov<sup>c</sup> and Slobodan Gadžurić<sup>a†</sup>

<sup>a</sup>*Faculty of Sciences, University of Novi Sad, Trg D. Obradovića 3, 21000 Novi Sad, Serbia*

<sup>b</sup>*Faculty of Technology, University of Novi Sad, Bulevar Cara Lazara 1, 21000 Novi Sad, Serbia*

<sup>c</sup>*Academy of Arts, University of Novi Sad, Đure Jakšića 7, 21000 Novi Sad, Serbia*

## Figs. S1-S9. FTIR spectra of investigated protic ionic liquids

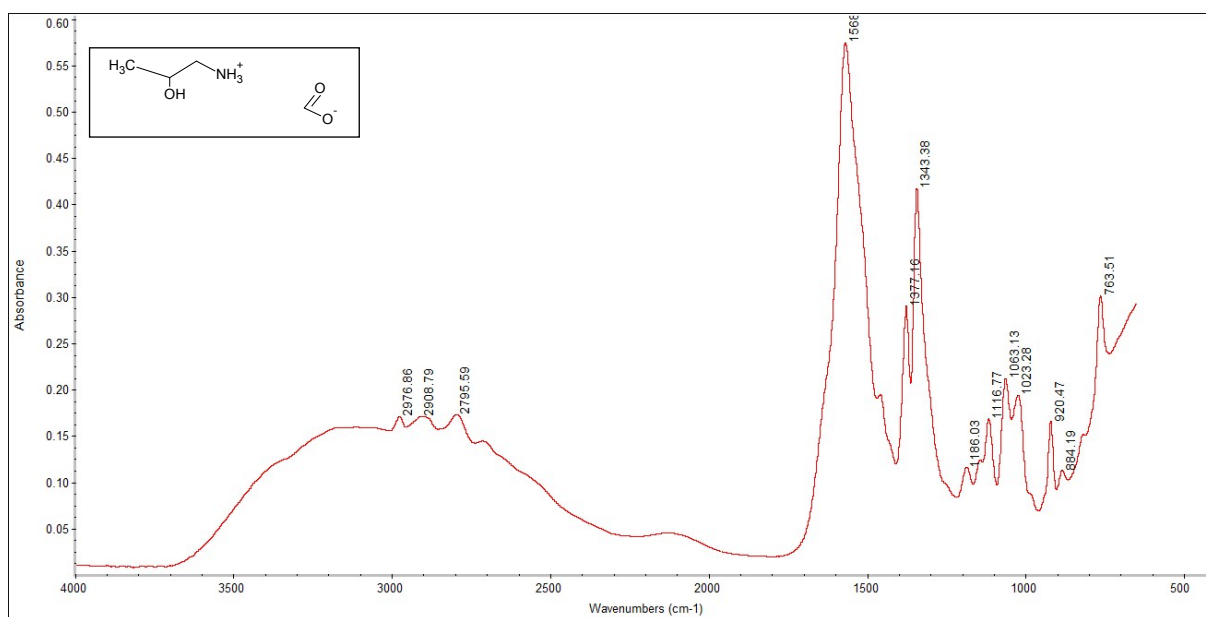

**Figure S1.** FTIR spectra of For

2976 (asym.  $\nu$  O-H); 2908 (asym.  $\nu$  N-H); 2795 (asym.  $\nu$  C-H); 1568 (asym.  $\nu$  COO<sup>-</sup>); 1377 (stretching  $\nu$  C-O); 1343 (asym. rocking  $\nu$  CH<sub>2</sub>); 1116 (stretching  $\nu$  C-N); 1063 (stretching  $\nu$  C-C); 1023 (NH wagging); 920 (CH<sub>2</sub> rocking vibration).

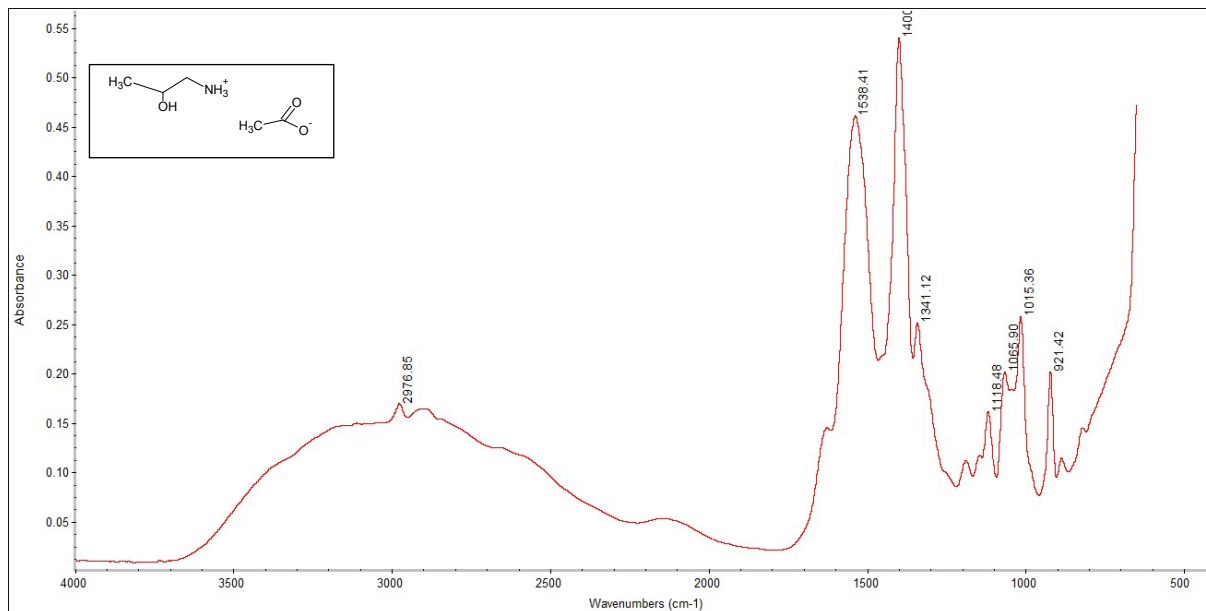

**Figure S2.** FTIR spectra of Ac

2976 (asym.  $\nu$  N-H); 1538 (asym.  $\nu$  COO<sup>-</sup>); 1400 (stretching  $\nu$  C-O); 1341 (asym. rocking  $\nu$  CH<sub>2</sub>); 1118 (stretching  $\nu$  C-N); 1065 (stretching  $\nu$  C-C); 1015 (NH wagging); 921 (CH<sub>2</sub> rocking vibration).

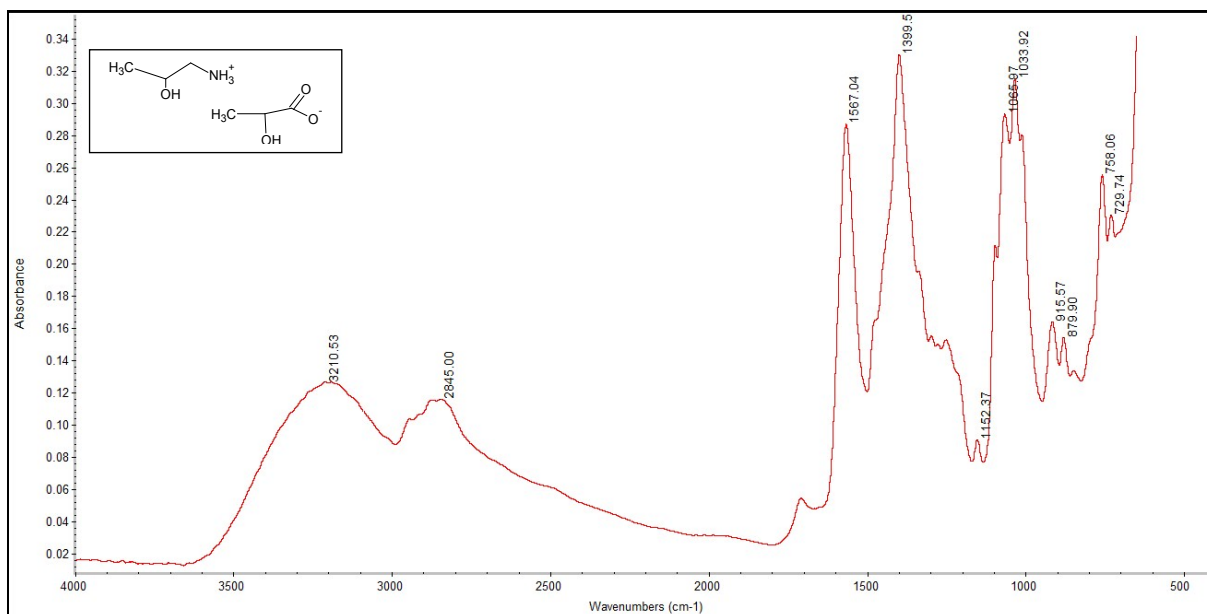

**Figure S3.** FTIR spectra of Lac

3210 (asym.  $\nu$  O-H); 2845 (asym.  $\nu$  C-H); 1567 (asym.  $\nu$  COO<sup>-</sup>); 1399 (stretching  $\nu$  C-O); 1065 (asym. rocking  $\nu$  CH<sub>2</sub>); 1033 (stretching  $\nu$  C-N); 915 (stretching  $\nu$  C-C); 879 (NH wagging); 758 (CH<sub>2</sub> rocking vibration).

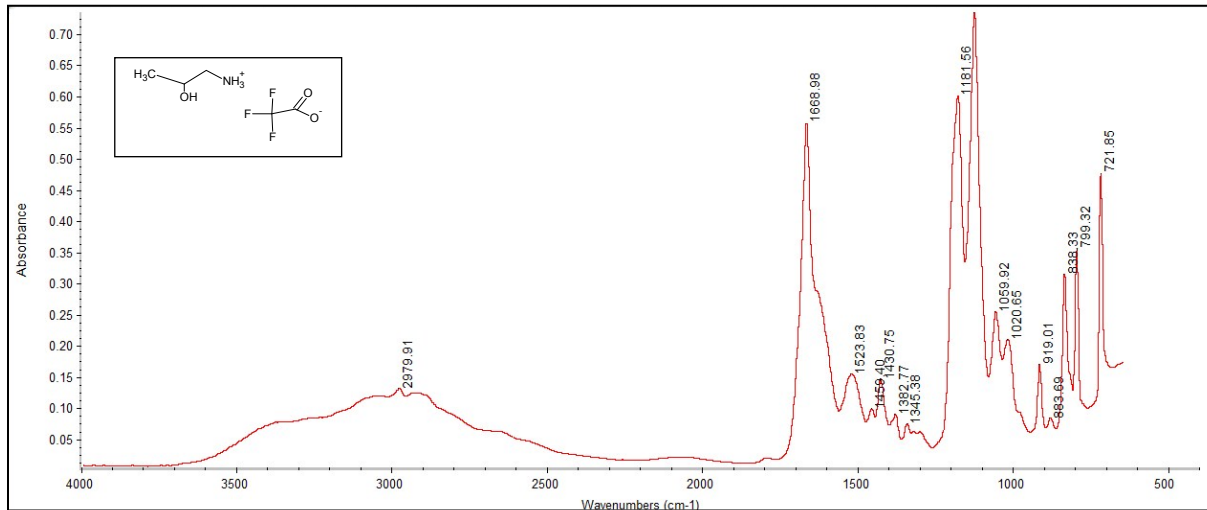

**Figure S4.** FTIR spectra of TFA

2979 (asym.  $\nu$  N-H); 1668 (asym.  $\nu$  COO<sup>-</sup>); 1430 (stretching  $\nu$  C-O); 1382 (asym. rocking  $\nu$ CH<sub>2</sub>); 1345 (vibration sym. CF<sub>3</sub>); 1059 (stretching  $\nu$  C-N); 1020 (stretching  $\nu$  C-C); 883 (NH wagging); 799 (CH<sub>2</sub> rocking vibration); 721 (deformation sym. CF<sub>3</sub>).

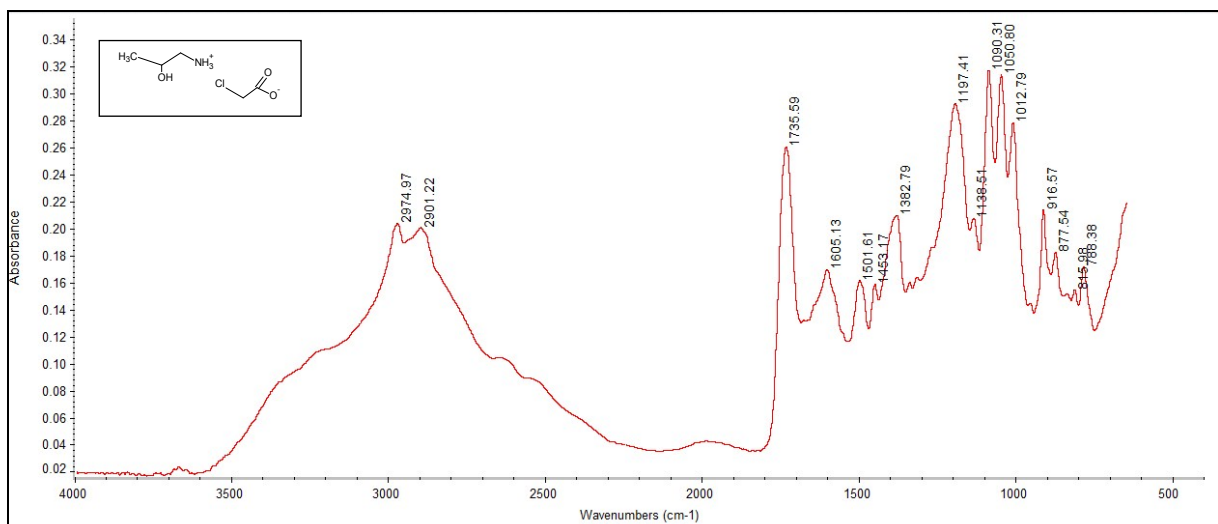

**Figure S5.** FTIR spectra of CIA

2974 (asym.  $\nu$  N-H); 2901 (asym.  $\nu$  C-H); 1735 (asym.  $\nu$  COO<sup>-</sup>); 1453 (deformation scissors CH<sub>2</sub>) 1382 (stretching  $\nu$  C-O); 1197 (asym. rocking  $\nu$  CH<sub>2</sub>); 1050 (stretching  $\nu$  C-N); 1012 (stretching  $\nu$  C-C); 916 (NH wagging); 815 (CH<sub>2</sub> rocking vibration); 788 (stretching  $\nu$  C-Cl).

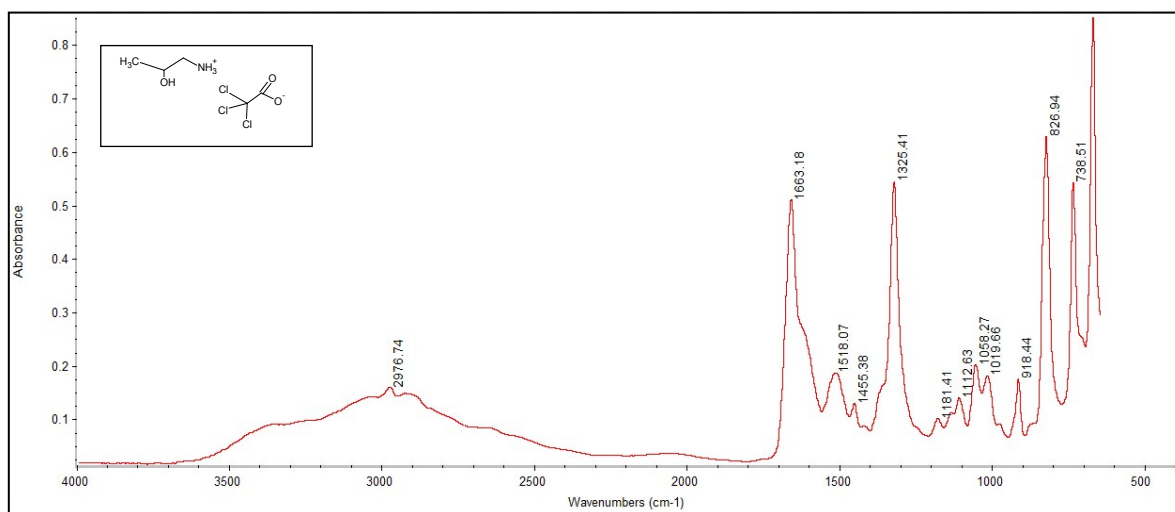

**Figure S6.** FTIR spectra of TCIA

2976 (asym.  $\nu$  N-H); 1663 (asym.  $\nu$  C-H); 1518 (asym.  $\nu$  COO<sup>-</sup>); 1455 (stretching  $\nu$  C-O); 1325 (asym. rocking  $\nu$  CH<sub>2</sub>); 1058 (stretching  $\nu$  C-N); 1019 (stretching  $\nu$  C-C); 918 (NH wagging); 826 (stretching  $\nu$  CCl<sub>3</sub>) 738 (CH<sub>2</sub> rocking vibration).

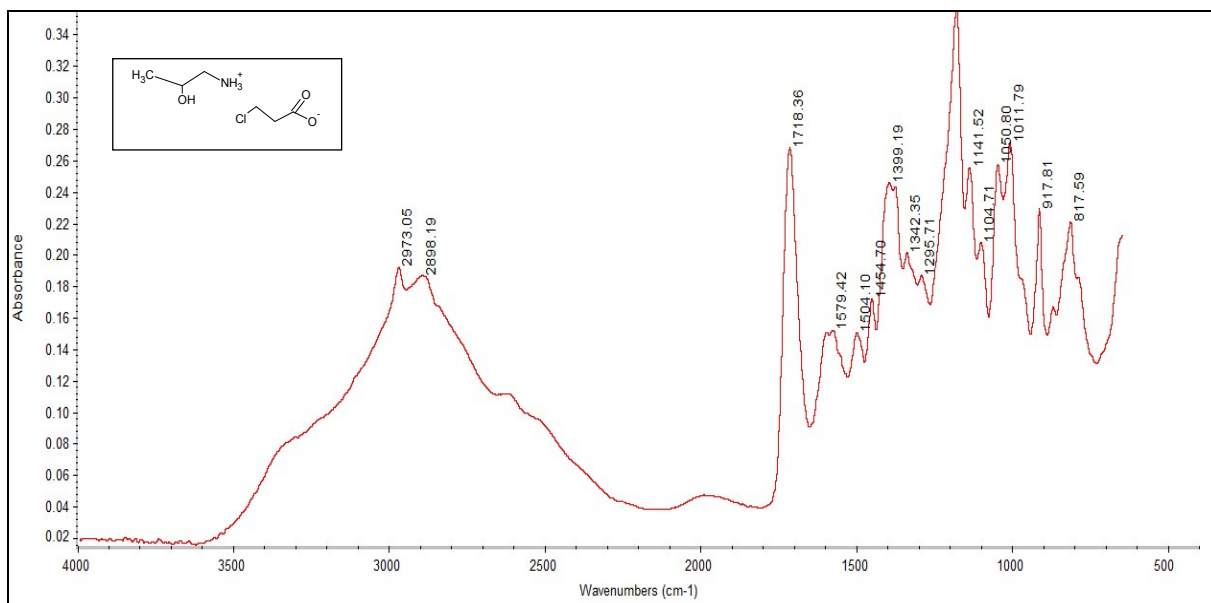

**Figure S7.** FTIR spectra of 3-CIP

2973 (asym.  $\nu$  N-H); 2898 (asym.  $\nu$  C-H); 1718 (asym.  $\nu$  COO<sup>-</sup>); 1454 (deformation scissors CH<sub>2</sub>) 1399 (stretching  $\nu$  C-O); 1342 (asym. rocking  $\nu$  CH<sub>2</sub>); 1104 (stretching  $\nu$  C-N); 1050 (stretching  $\nu$  C-C); 1011 (NH wagging); 917 (CH<sub>2</sub> rocking vibration); 817 (stretching  $\nu$  C-Cl).

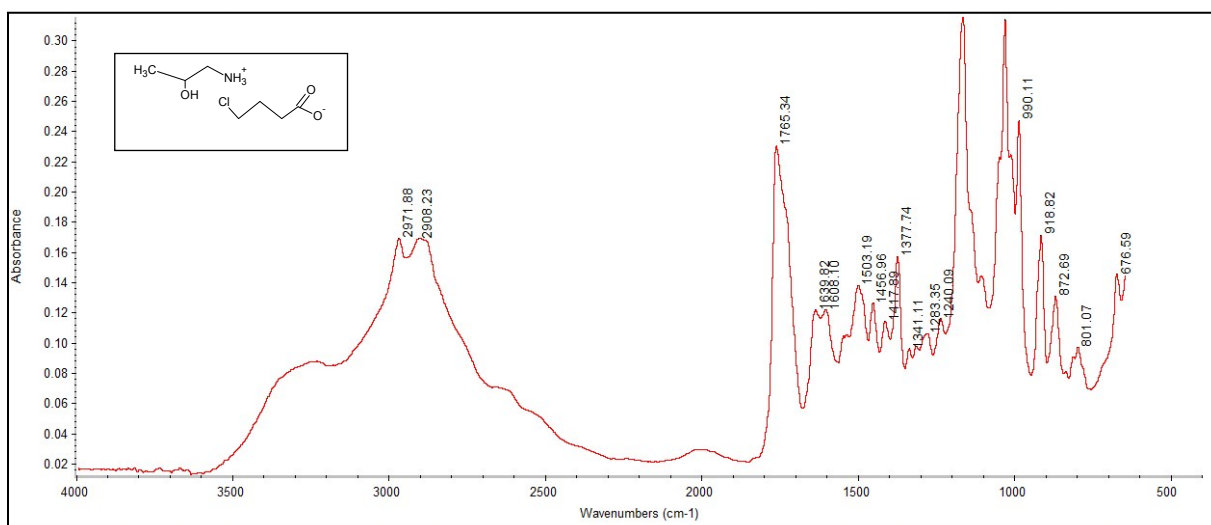

**Figure S8.** FTIR spectra of 4-CIB

2971 (asym.  $\nu$  N-H); 2808 (asym.  $\nu$  C-H); 1765 (asym.  $\nu$  COO<sup>-</sup>); 1456 (deformation scissors CH<sub>2</sub>) 1377 (stretching  $\nu$  C-O); 1341 (asym. rocking  $\nu$  CH<sub>2</sub>); 990 (stretching  $\nu$  C-N); 918 (stretching  $\nu$  C-C); 8721 (NH wagging); 801 (CH<sub>2</sub> rocking vibration); 676 (stretching  $\nu$  C-Cl).

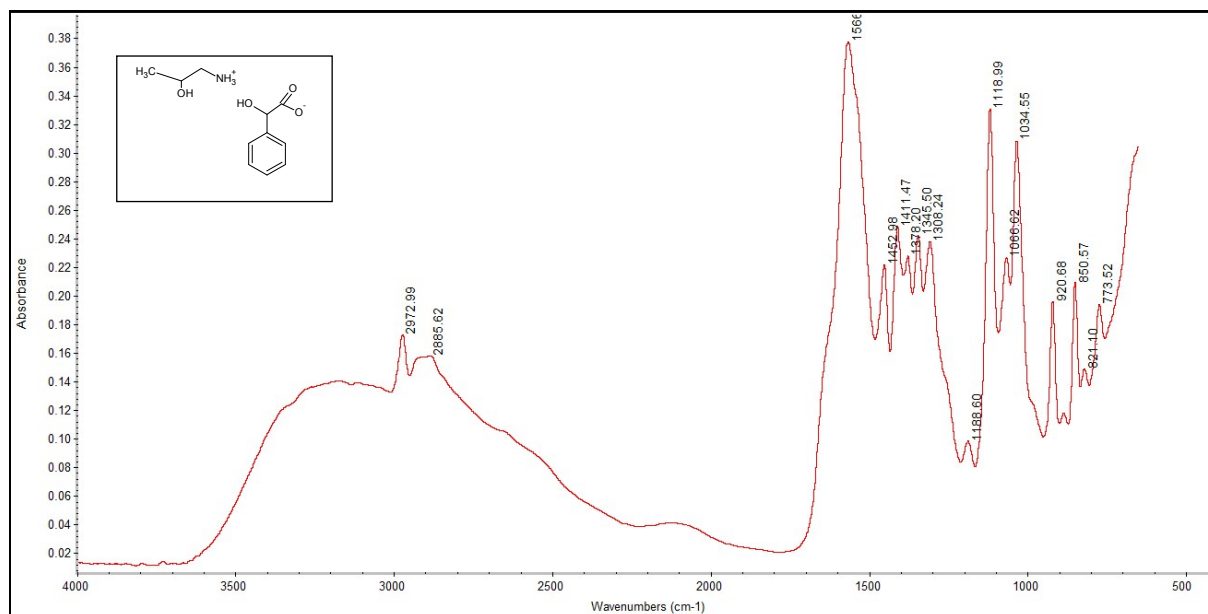

**Figure S9.** FTIR spectra of Man

2972 (asym.  $\nu$  O-H); 2885 (asym.  $\nu$  C-H); 1566 (asym.  $\nu$  COO<sup>-</sup>); 1452 (valence stretching vibration CC); 1411 (deformation vibration CH); 1378 (stretching  $\nu$  C-O); 1345 (in-plane bending mode  $\delta$  O-H); 1308 (stretching C-C); 1118 (stretching  $\nu$  C-N); 1066 (stretching  $\nu$  C-C); 1034 (NH wagging); 920 (CH<sub>2</sub> rocking vibration); 850 (in-plane bending mode  $\gamma$  CC); 773 (out-of-plane deformation  $\gamma$  CC).

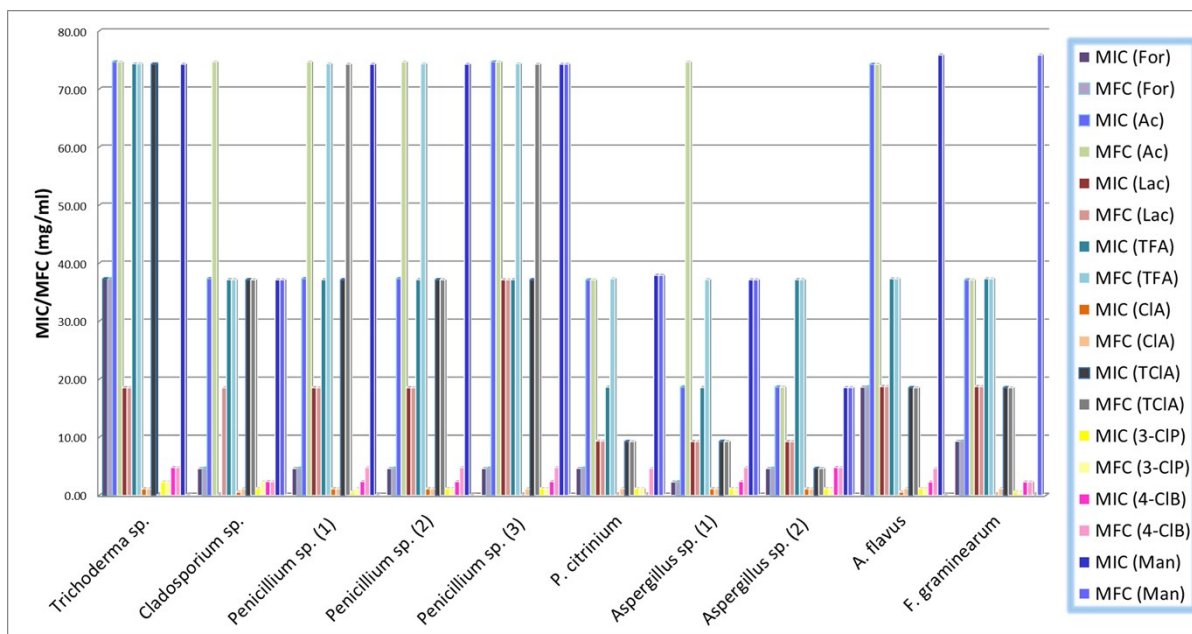

**Figure S10.** Antifungal activity of newly synthesized nine different protic ionic liquids

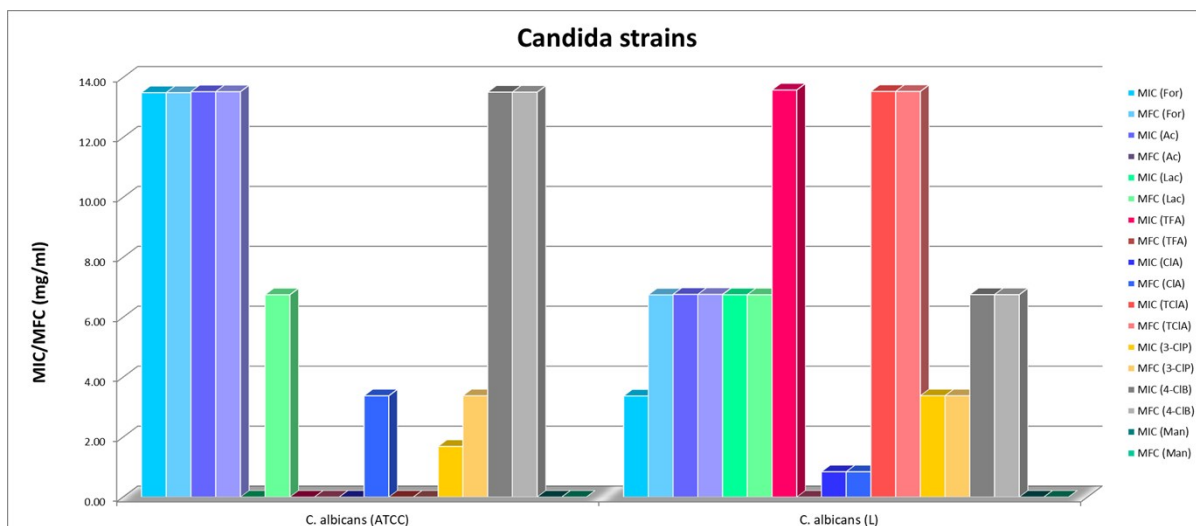

**Figure S11.** Antifungal activity of newly synthesized nine different protic ionic liquids



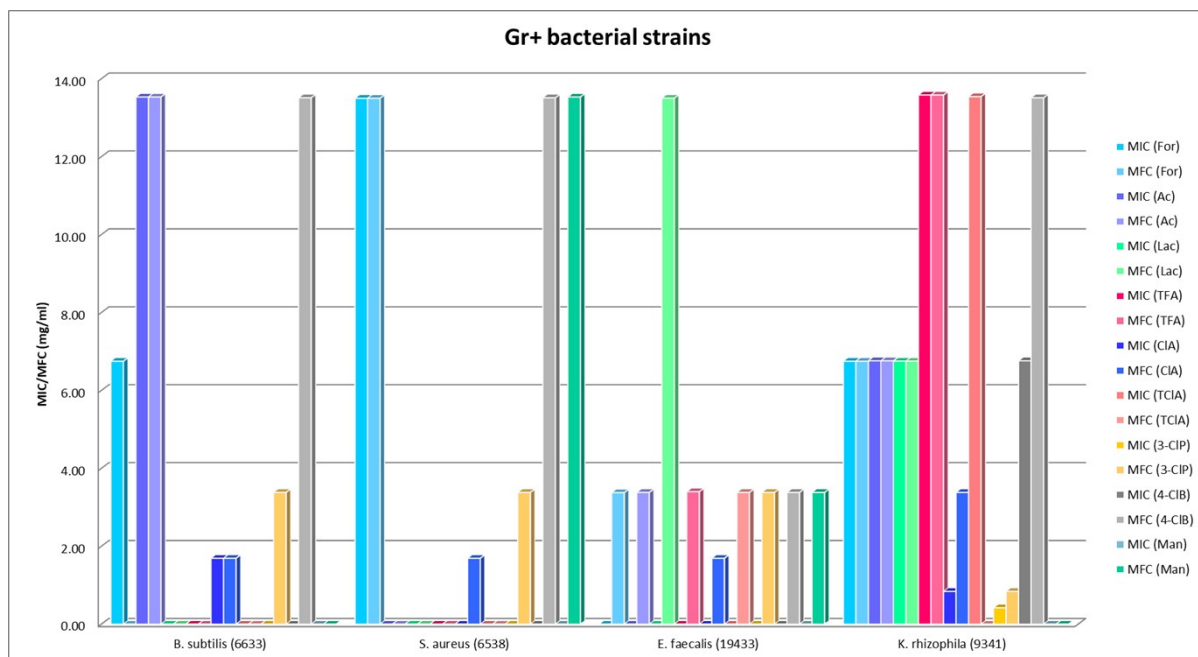

**Figure S12.** Antibacterial activity of newly synthesized nine different protic ionic liquids on Gr+ bacterial

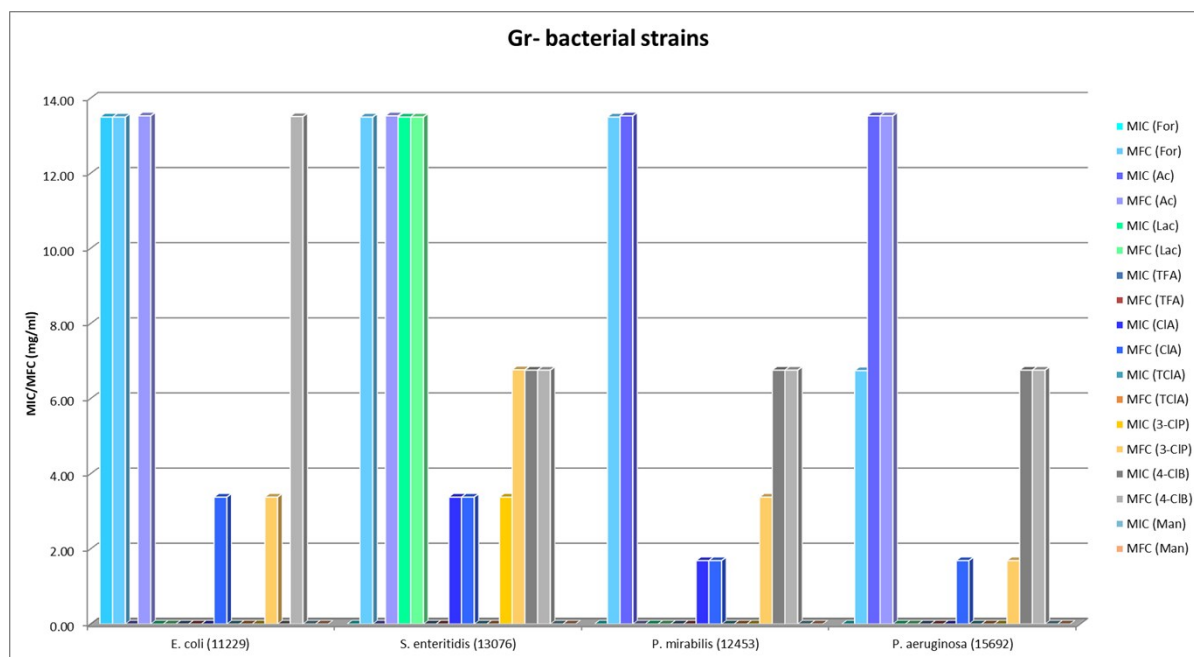

**Figure S13.** Antibacterial activity of newly synthesized nine different protic ionic liquids on Gr- bacterial

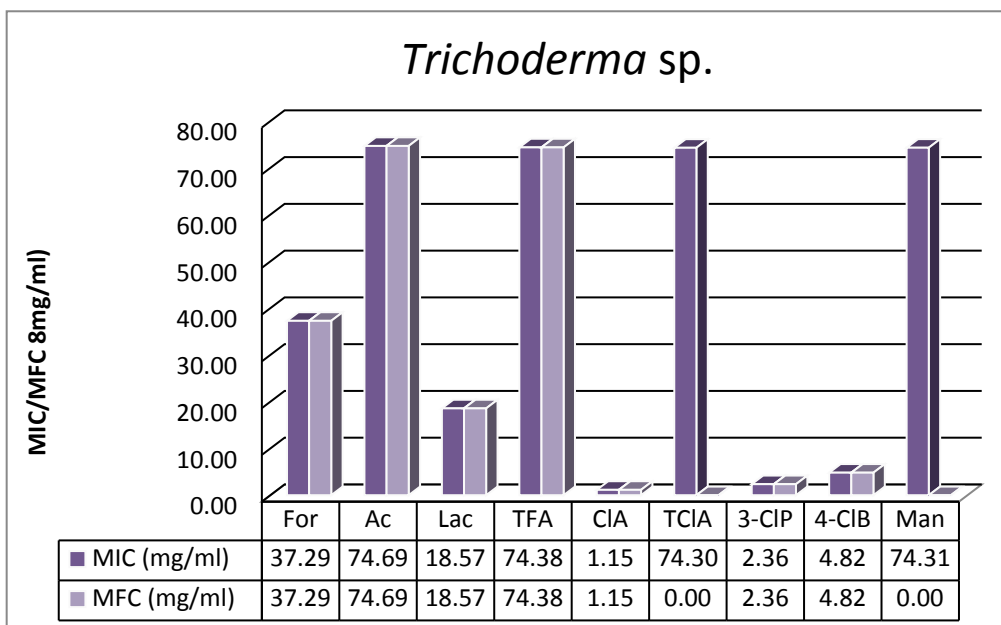

**Figure S14.** Antifungal activity of newly synthesized nine different protic ionic liquids on *Trichoderma sp.*

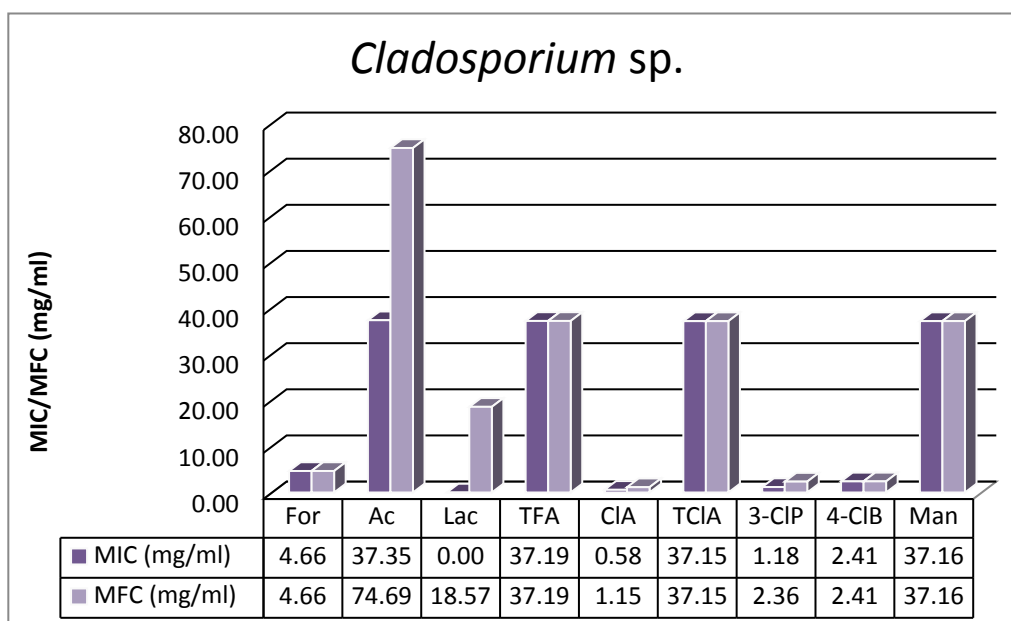

**Figure S15.** Antifungal activity of newly synthesized nine different protic ionic liquids on *Cladosporium sp.*

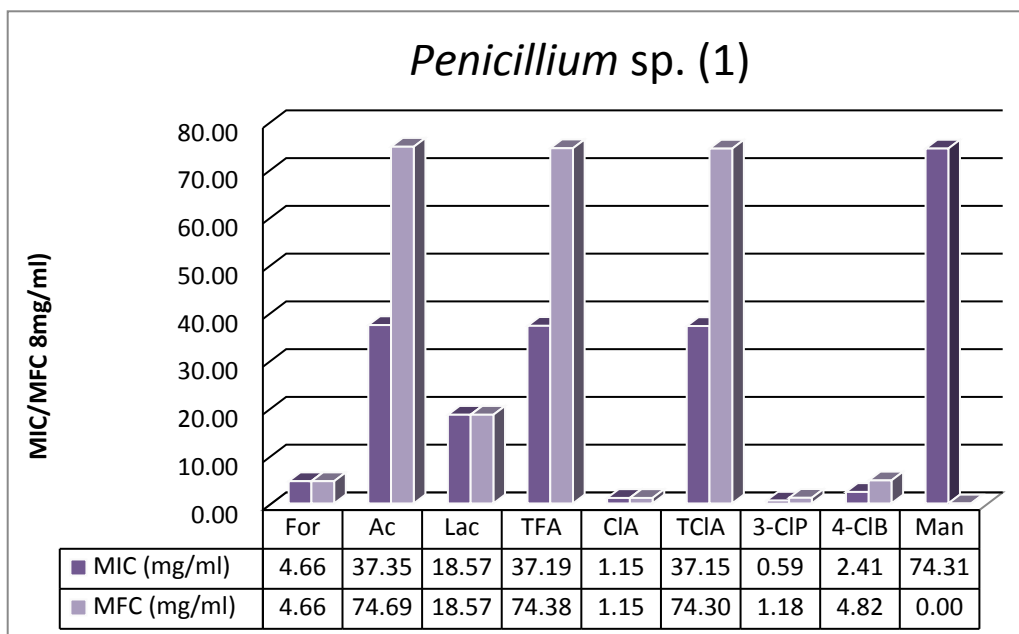

**Figure S16.** Antifungal activity of newly synthesized nine different protic ionic liquids on *Penicillium sp.* <sup>(1)</sup>

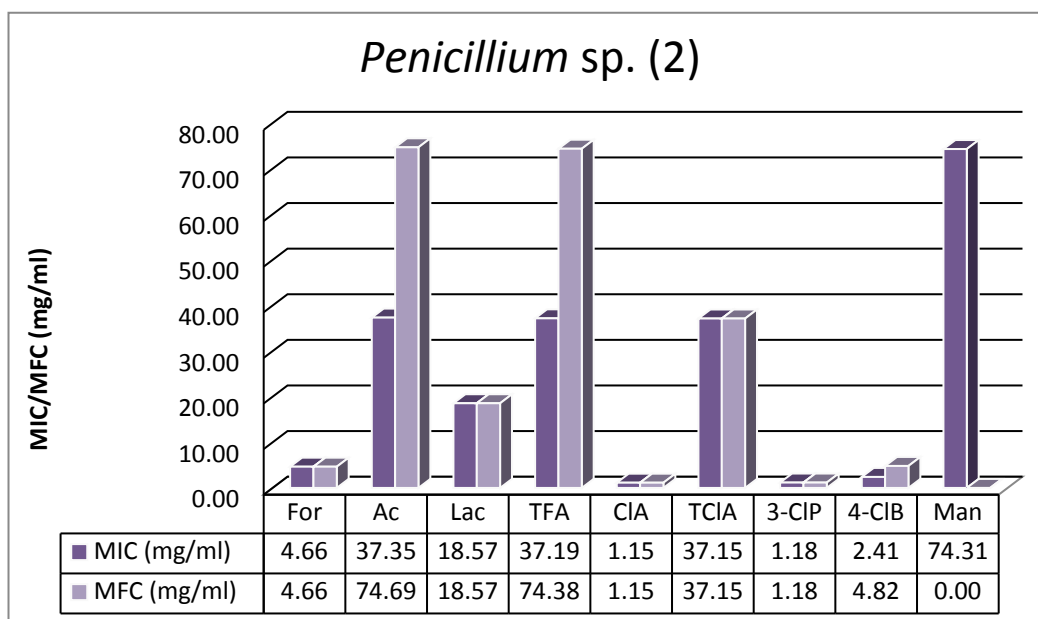

**Figure S17.** Antifungal activity of newly synthesized nine different protic ionic liquids on *Penicillium sp.* <sup>(2)</sup>

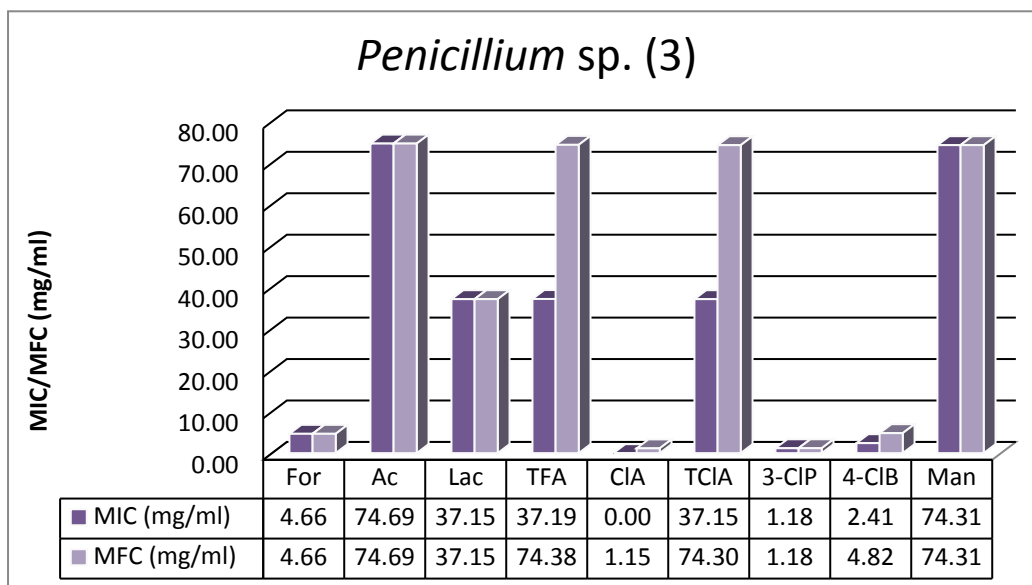

**Figure S18.** Antifungal activity of newly synthesized nine different protic ionic liquids on *Penicillium sp.* <sup>(3)</sup>

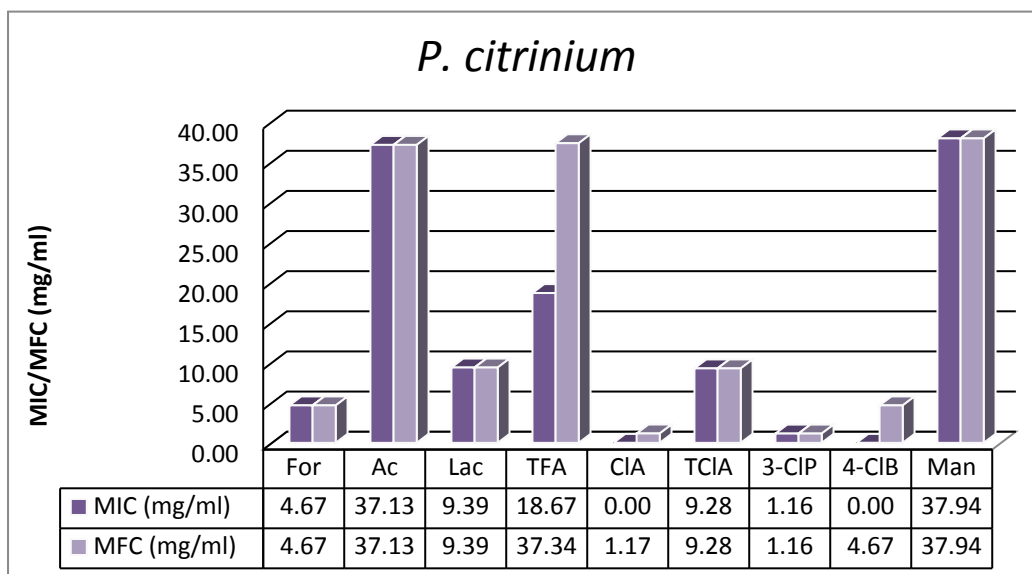

**Figure S19.** Antifungal activity of newly synthesized nine different protic ionic liquids on *P. citrinum*

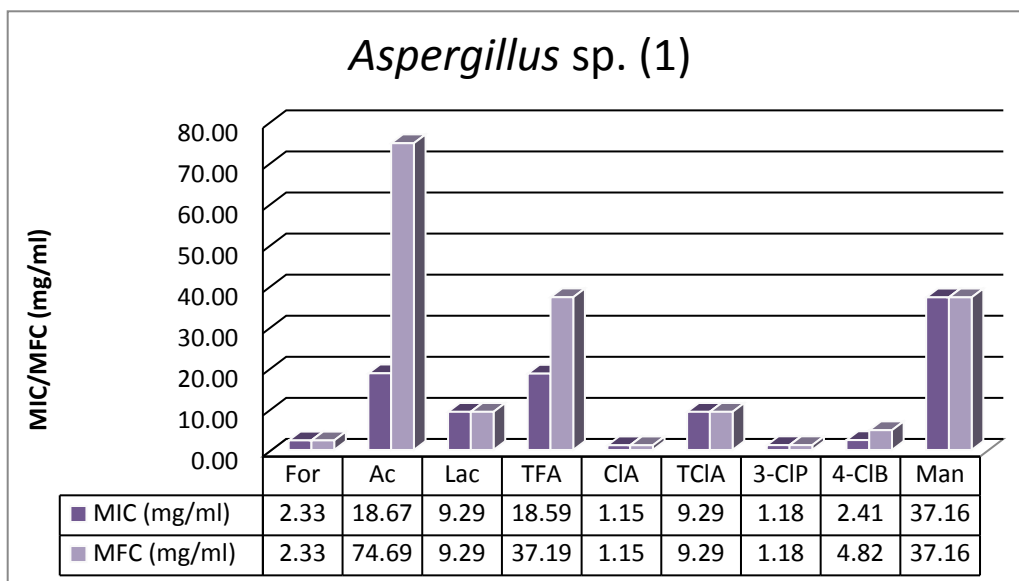

**Figure S20.** Antifungal activity of newly synthesized nine different protic ionic liquids on *Aspergillus sp.* <sup>(1)</sup>

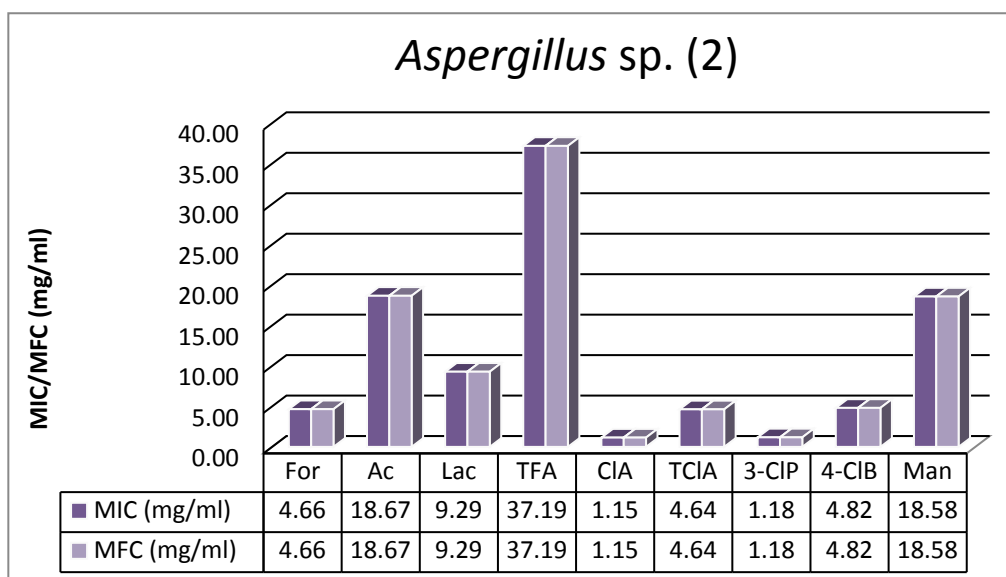

**Figure S21.** Antifungal activity of newly synthesized nine different protic ionic liquids on *Aspergillus sp.* <sup>(2)</sup>

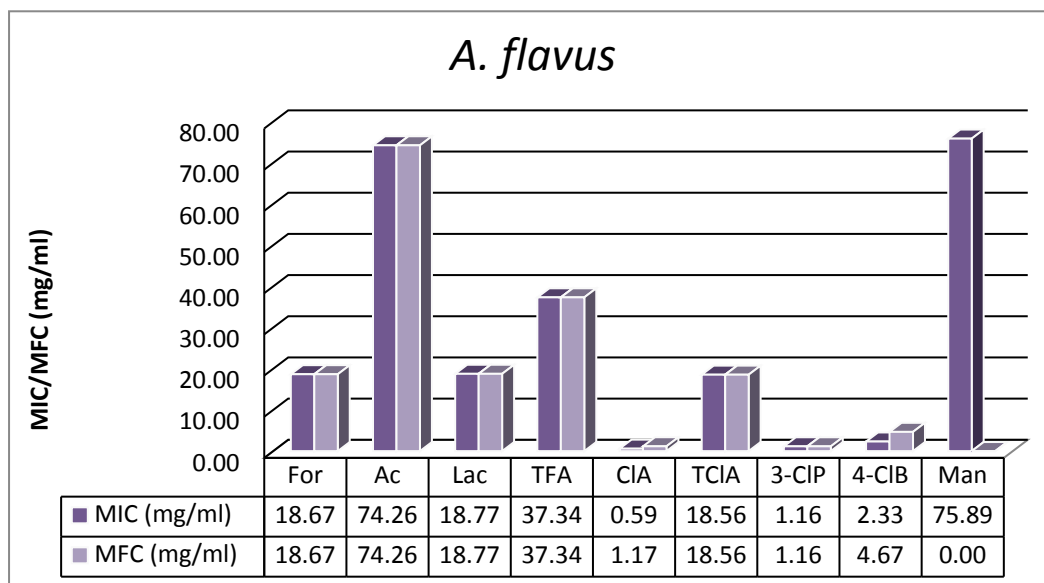

**Figure S22.** Antifungal activity of newly synthesized nine different protic ionic liquids on *A. flavus*

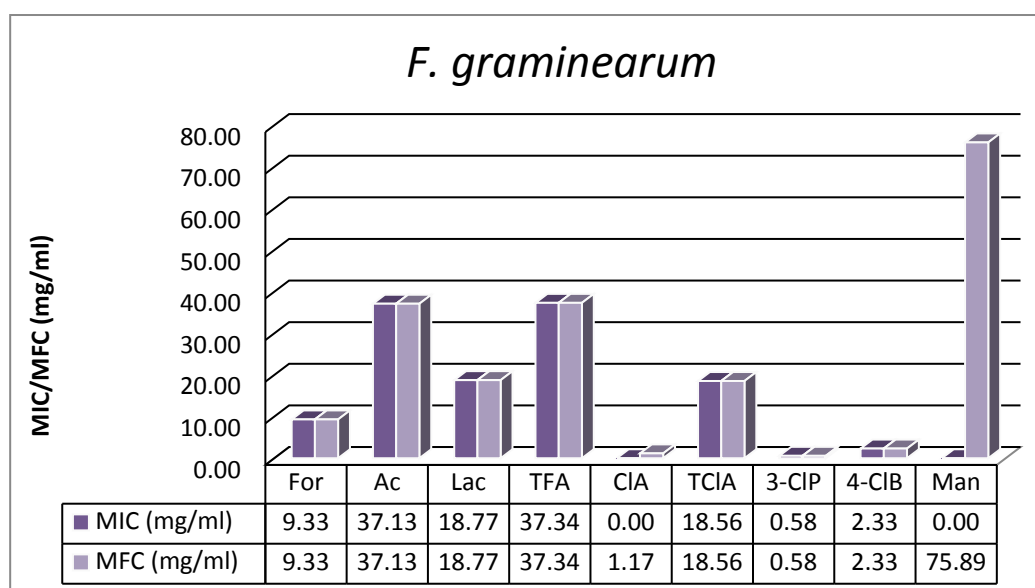

**Figure S23.** Antifungal activity of newly synthesized nine different protic ionic liquids on *F. graminearum*
